# Supplementary material for: Insights into the Structural Dynamics of Pt/CeO2 Single-Site Catalysts during CO Oxidation
Source: MDPI journal article supplement (doi:10.3390/catal11050617), 2021-05-11
Supplement: s1 [file s1]

# Insights into the structural dynamics of Pt/CeO<sub>2</sub> single-site cat-alysts during CO oxidation

Paolo Dolcet <sup>1</sup>, Florian Maurer <sup>1</sup>, Maria Casapu <sup>1</sup>, and Jan-Dierk Grunwaldt <sup>1,2,\*</sup>

<sup>1</sup> Institute for Chemical Technology and Polymer Chemistry (ITCP), Karlsruhe Institute of Technology (KIT), Engesserstraße 20, 76131 Karlsruhe, Germany; paolo.dolcet@kit.edu (P.D.), florian.maurer@kit.edu (F.M.), maria.casapu@kit.edu (M.C.)

<sup>2</sup> Institute of Catalysis Research and Technology (IKFT), Karlsruhe Institute of Technology (KIT), Hermann-von-Helmholtz-Platz 1, 76344 Eggenstein-Leopoldshafen, Germany; grunwaldt@kit.edu (J.-D.G.)

\* Correspondence: grunwaldt@kit.edu;

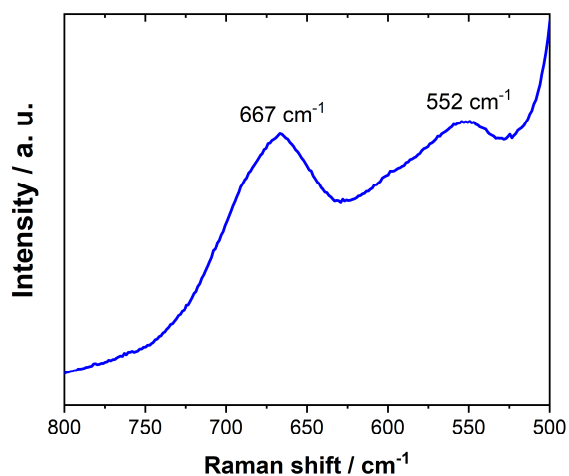

**Figure S1.** Raman spectra of as-prepared Pt single site catalyst

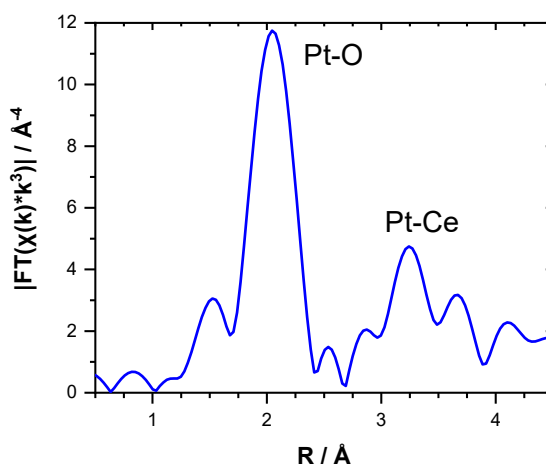

**Figure S2.** Fourier transformed  $k^2$ -weighted EXAFS spectrum of the as prepared Pt/CeO<sub>2</sub> catalyst

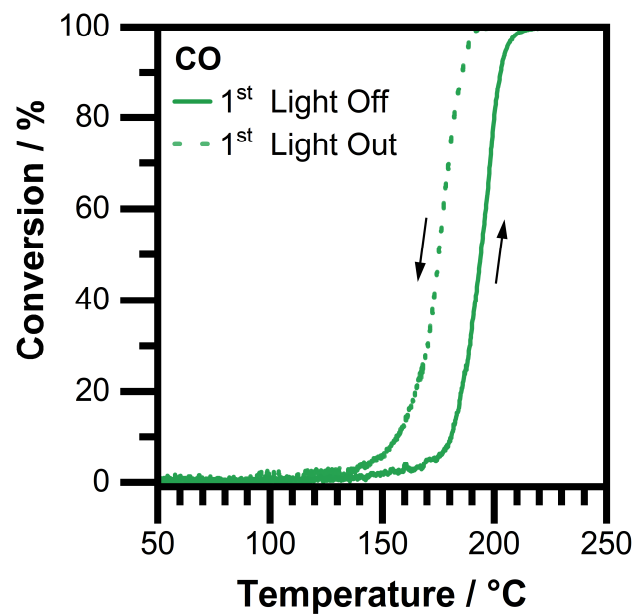

**Figure S3.** CO conversion curves for consecutive light-offs (1000 ppm CO and 8% O<sub>2</sub>)

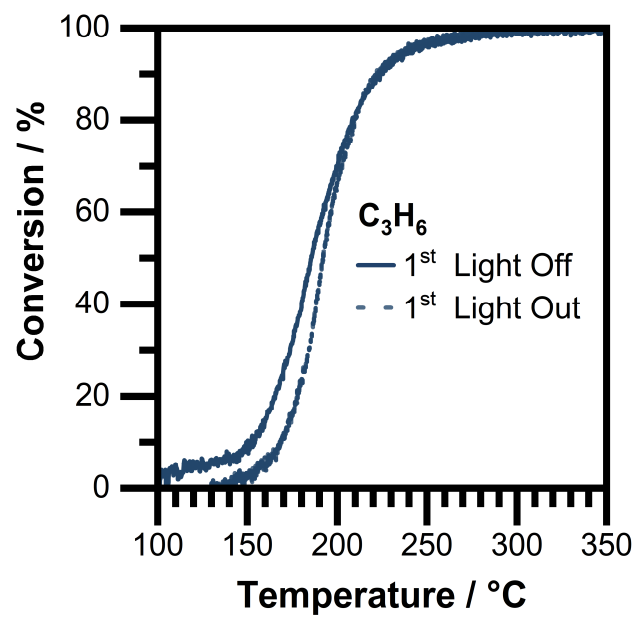

**Figure S4.** C<sub>3</sub>H<sub>6</sub> conversion curves for consecutive light-offs (150 ppm C<sub>3</sub>H<sub>6</sub> and 8% O<sub>2</sub>)

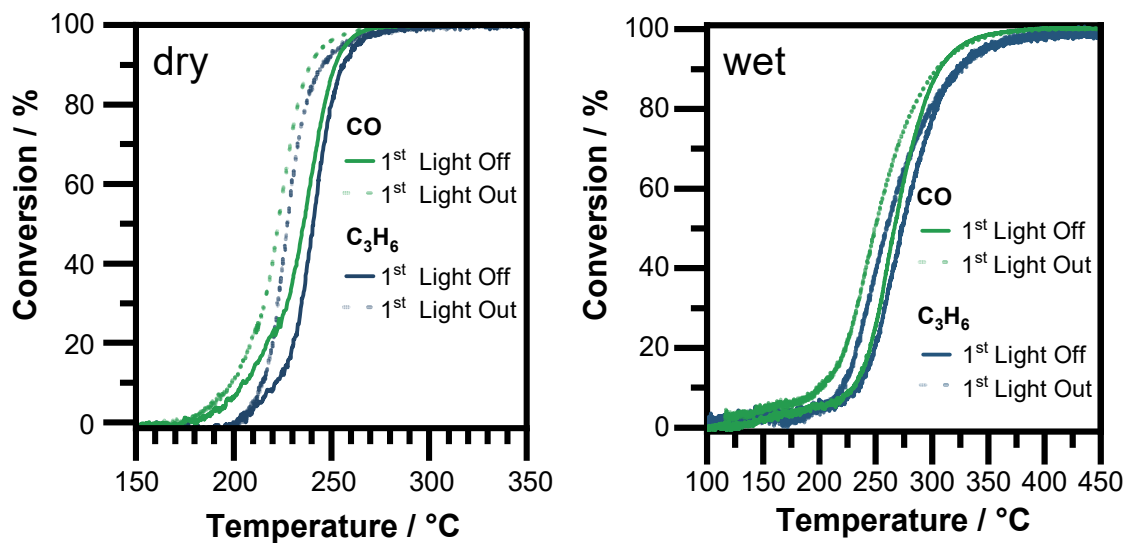

**Figure S5.** CO (green lines) and (blue lines) C<sub>3</sub>H<sub>6</sub> conversion curves light-offs in dry (left, 1000ppm/150 ppm C<sub>3</sub>H<sub>6</sub> and 8% O<sub>2</sub>) and wet (right, 1000ppm/150 ppm C<sub>3</sub>H<sub>6</sub>, 6.6% H<sub>2</sub>O and 8% O<sub>2</sub>) conditions

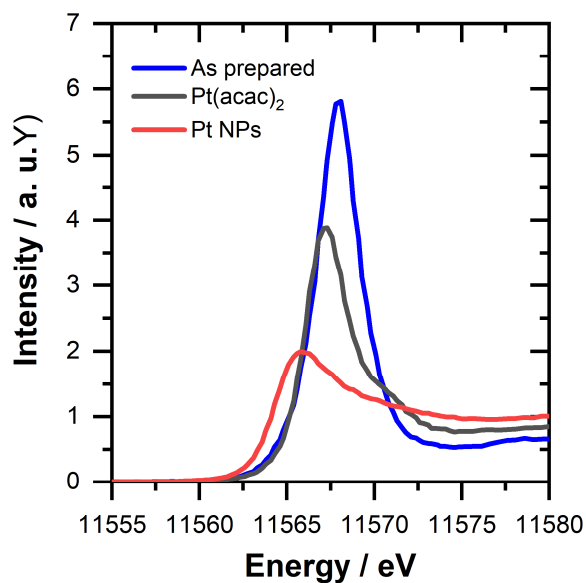

**Figure S6.** Pt-L<sub>III</sub> edge HERFD-XANES spectrum of as prepared single sites catalyst compared to metallic Pt nanoparticles and Pt(II)(acac)<sub>2</sub> reference spectra

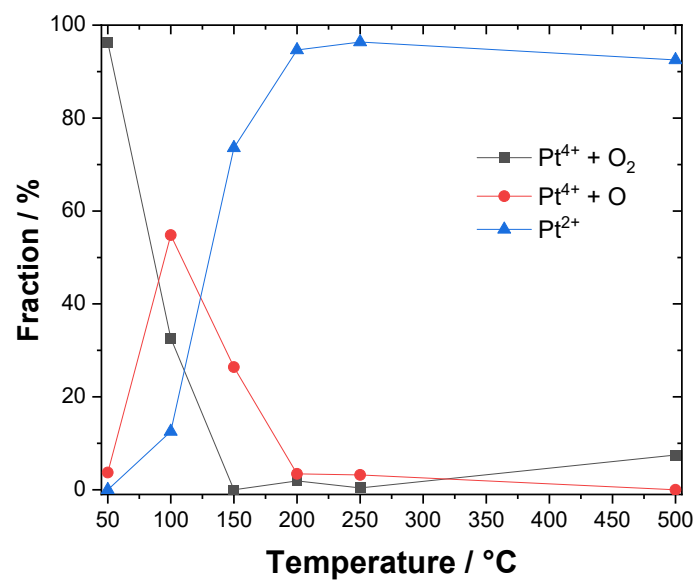

**Figure S7.** Pt species identified by MCR-ALS during temperature programmed oxidation in 10 % O<sub>2</sub>/He

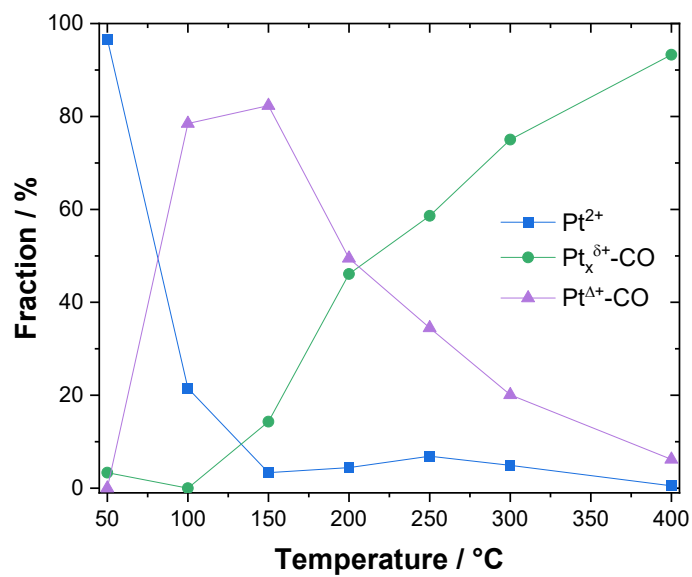

**Figure S8.** Pt species identified by MCR-ALS during temperature programmed reduction in 1000 ppm CO/He

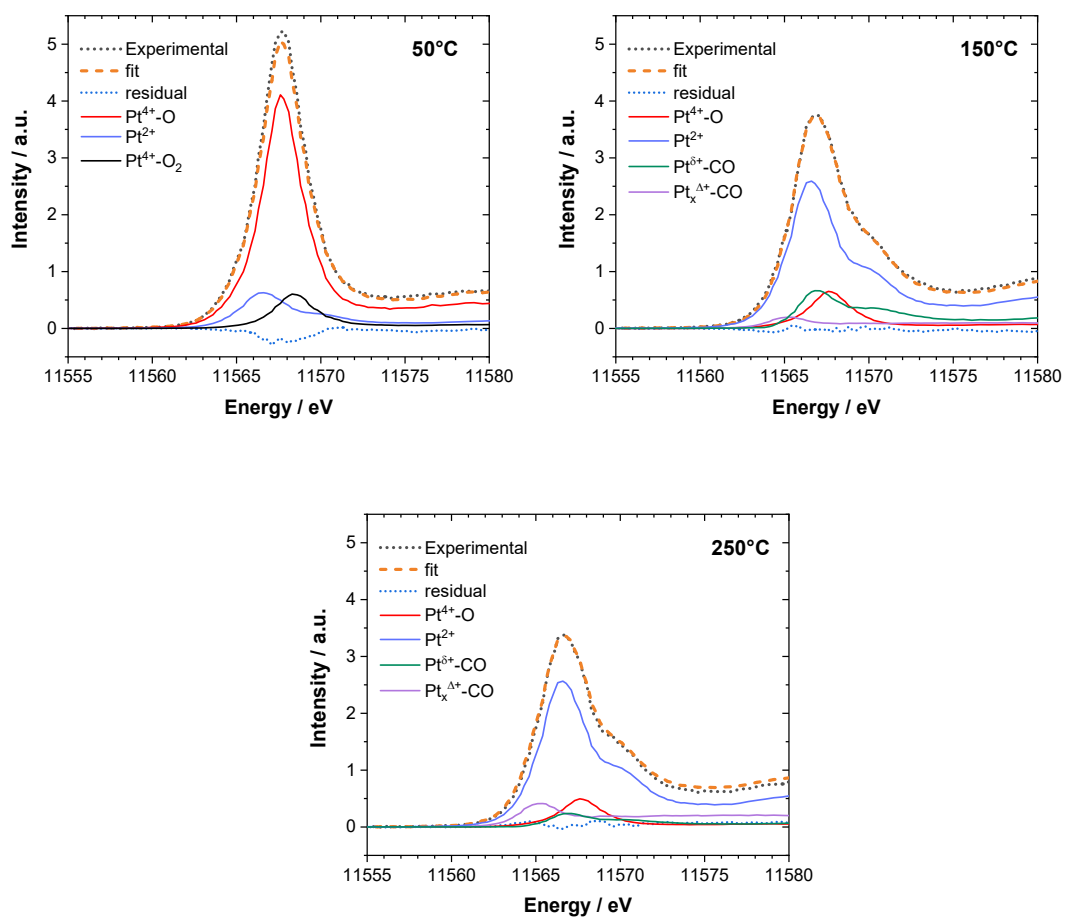

**Figure S9.** Pt species identified by MCR-ALS during temperature programmed reduction in 1000 ppm CO/He
